# Supplementary material for: Stress type–specific small extracellular vesicle signatures reflect divergent biological responses to acute psychosocial and physical challenges
Source: Sci Rep. 2025 Oct 9;15:35231. doi: 10.1038/s41598-025-21575-5 (PMC12511347; doi:10.1038/s41598-025-21575-5)
Supplement: Supplementary file 4 — Supplementary Information 4. [file 41598_2025_21575_MOESM5_ESM.xlsx]

## Sheet: Tabelle1
reference	VPN	time_point	stress	CD41	PS	CD61	HLA-ABC	CD81	CD227	C3b/C3i	CD9	CD24	CD13	CD100	CD82	CTLA-4	PD-L1	CD16	HLA-DR	CD171	CD273	CD63	CD90	CD66b	CD44	CD235a	CD14	CD206
VP1 2 TSST	1	2	TSST	8010000	6240000	564000	1995000	2530000	42950000	19400	12450000	112500	87400	1101500	609500	2630000	552000	662000	497500	-99	0	-99	120000	2795000	43600	12650000	-99	2.61136e+06
VP1 3 TSST	1	3	TSST	13950000	5480000	1011000	2695000	2780000	35550000	19450	20450000	145500	177500	1115000	1190000	2640000	357500	1023500	1075000	-99	0	-99	90950	4360000	58150	8565000	-99	2.18622e+06
VP1 4 TSST	1	4	TSST	15200000	4975000	1171500	2470000	2380000	41450000	13330	22550000	119500	105800	648000	711000	2570000	458500	906500	556500	-99	0	-99	116000	2975000	67700	11000000	-99	2.33185e+06
VP1 5 TSST	1	5	TSST	16500000	3300000	1555000	2005000	2070000	25395000	24300	23950000	87250	174500	654000	953000	2320000	294750	1390000	669500	-99	0	-99	83600	4165000	66650	7060000	-99	3.18923e+06
VP1 6 TSST	1	6	TSST	15150000	2820000	1330000	1880000	2345000	44300000	18200	23050000	109050	193000	926000	712000	2565000	1058000	701000	557000	-99	1215	-99	80100	4170000	86000	13990000	-99	2.01492e+06
VP1 2 Sport	1	2	Sport	9825000	5220000	863500	2790000	2940000	51000000	10910	15500000	149000	500500	2930000	951500	3290000	706000	577000	836500	-99	1215	-99	112500	5330000	137000	10865000	-99	1.30538e+06
VP1 3 Sport	1	3	Sport	32200000	18100000	2195000	11250000	6745000	177000000	274000	39850000	711000	778000	1230000	5995000	5575000	13950000	11885000	5995000	-99	0	-99	12972.4	1.562e+06	126992	8.4172e+06	-99	5.37164e+06
VP1 4 Sport	1	4	Sport	56850000	18100000	3775000	8360000	8950000	208000000	1306500	70800000	684500	1049000	566500	5260000	5560000	22500000	13600000	5260000	-99	0	-99	13348.6	1.2675e+06	152171	1.46568e+07	-99	4.06678e+06
VP1 5 Sport	1	5	Sport	37950000	3725000	2410000	5625000	8390000	137500000	346000	47950000	367500	545500	574000	3575000	6340000	11650000	9805000	3575000	-99	0	-99	12266.3	1.12273e+06	123915	8.67137e+06	-99	4.73225e+06
VP1 6 Sport	1	6	Sport	26350000	6225000	1755000	3900000	6165000	162500000	263000	35250000	265500	755000	462000	3035000	5120000	15600000	6540000	3035000	-99	0	-99	11184	1.13463e+06	79972.1	8.61143e+06	-99	4.21801e+06
VP2 2 TSST	2	2	TSST	16250000	2100000	350000	77550000	69650000	216500000	175850	27500000	144000	7550000	383500000	4070000	7180000	33500000	2585000	4070000	-99	723.62	-99	156215	2.72216e+06	49065.2	4.05358e+06	-99	8.90676e+06
VP2 3 TSST	2	3	TSST	22700000	7090000	594000	132000000	64200000	208000000	98150	37600000	342500	14100000	511500000	6300000	6130000	36150000	4130000	6300000	-99	717.435	-99	499310	4.86178e+06	36693.7	3.01698e+06	-99	7.94428e+06
VP2 4 TSST	2	4	TSST	23100000	1340000	288000	71250000	101900000	306500000	115550	39900000	159000	16200000	237500000	3135000	11950000	27600000	1920000	1445000	-99	0	-99	2630000	7345000	144000	12500000	-99	33950000
VP2 5 TSST	2	5	TSST	23450000	2355000	317500	79050000	91650000	294500000	79500	41600000	213000	19900000	276500000	2775000	11300000	21700000	2130000	1180000	-99	0	-99	2595000	7665000	90100	11600000	-99	37200000
VP2 6 TSST	2	6	TSST	25350000	768500	343000	69850000	103050000	284000000	50550	50650000	97400	17800000	267000000	3205000	10860000	20300000	1955000	1515000	-99	0	-99	2120000	8885000	83100	11300000	-99	33500000
VP2 2 Sport	2	2	Sport	26850000	237500	432000	54800000	86450000	265500000	57700	47300000	144000	22450000	227500000	3370000	8610000	19950000	1895000	1145000	-99	3610	-99	1380000	10000000	54100	13650000	-99	29250000
VP2 3 Sport	2	3	Sport	65950000	3600000	1205000	45200000	98150000	291500000	100750	100950000	760500	38500000	242000000	7755000	14550000	29250000	7415000	4500000	-99	0	-99	1019000	16400000	338500	21800000	-99	38550000
VP2 4 Sport	2	4	Sport	71650000	8300000	1030000	39800000	85750000	279500000	72050	105500000	862000	44000000	279500000	8465000	13100000	29000000	7910000	4995000	-99	7200	-99	583500	19350000	299000	18150000	-99	33600000
VP2 5 Sport	2	5	Sport	2.82053e+07	2.00108e+06	899373	2.5301e+07	8.79605e+07	433161923	100852	3.89347e+07	173430	2.62076e+07	2.25184e+08	5.13209e+06	7.923e+06	1.76658e+07	6.16033e+06	3.26092e+06	-99	0	-99	180387	4.0006e+06	147506	1.54939e+07	-99	4.74181e+07
VP2 6 Sport	2	6	Sport	81127101	1.27353e+06	1.0917e+06	3.34101e+07	8.86348e+07	378689344	144537	1.189e+08	104624	2.46271e+07	232959860	3.08822e+06	6.25581e+06	1.31502e+07	5.35804e+06	1.57297e+06	-99	3607.73	-99	324273	1.63791e+06	104624	1.30203e+07	-99	5.68036e+07
VP3 2 TSST	3	2	TSST	9.62516e+06	1.00066e+06	1.01088e+06	1.76779e+06	4.42056e+07	2.20793e+06	14389.8	1.38202e+07	155381	345353	1.00656e+06	1.80387e+06	1.09747e+07	1.00295e+07	1.60393e+06	1.50082e+06	-99	0	-99	75762.4	645784	43292.8	2.65529e+07	-99	305650
VP3 3 TSST	3	3	TSST	1.06201e+07	3.33355e+06	1.89767e+06	5.00393e+06	88180220	2.7058e+06	72154.7	1.50152e+07	454574	400458	2.68055e+06	3.93964e+06	1.92112e+07	1.08809e+07	4.29681e+06	3.8711e+06	-99	0	-99	43292.8	1.05707e+06	119055	2.90386e+07	-99	324696
VP3 4 TSST	3	4	TSST	8.22563e+06	3.69071e+06	1.01738e+06	3.02689e+06	5.80124e+07	660215	82864.5	1.20462e+07	461790	306657	2.58674e+06	2.2837e+06	1.26162e+07	7.61593e+06	2.18345e+06	1.78944e+06	-99	0	-99	64939.2	595276	90193.3	2.92695e+07	-99	262942
VP3 5 TSST	3	5	TSST	9.8345e+06	1.10036e+06	1.08232e+06	2.56133e+06	5.99266e+07	907850	75762.4	1.54181e+07	220072	252541	2.05636e+06	2.23319e+06	1.1266e+07	5.10118e+06	1.99508e+06	1.85077e+06	-99	0	-99	39654.4	793701	54178.2	1.64634e+07	-99	364381
VP3 6 TSST	3	6	TSST	1.29422e+07	3.02792e+07	1.15808e+06	9.48933e+06	7.82982e+07	3.66681e+06	46838.7	2.29365e+07	1.32579e+06	562806	3.3448e+06	3.36602e+06	2.27746e+07	2.85112e+07	1.64661e+06	2615000	-99	3610	-99	79450	2930000	83350	52850000	-99	306000
VP3 2 Sport	3	2	Sport	1.63097e+07	14669044	2.5651e+06	1.01594e+07	8.073e+07	1.20658e+07	57631	3.22568e+07	660215	707116	4.13446e+06	5.22039e+06	2.27997e+07	1.91419e+07	2.74148e+06	2990000	-99	0	-99	64950	3445000	112000	32750000	-99	335000
VP3 3 Sport	3	3	Sport	5.01028e+07	2.56382e+07	1.08419e+07	2.49433e+07	8.91788e+07	5.74459e+07	212856	7.43562e+07	5.32302e+06	3.17327e+06	7.57709e+06	1.99832e+07	2.43205e+07	5.32898e+07	2.16861e+07	15850000	-99	14400	-99	126500	11305000	599500	90550000	-99	422500
VP3 4 Sport	3	4	Sport	5.16565e+07	3.59114e+07	4.47359e+06	1.10658e+07	110205432	1.06897e+07	111665	8.3037e+07	5.04361e+06	1.95178e+06	1.31833e+06	1.23126e+07	1.05851e+07	8.50812e+07	1.15616e+07	9650000	-99	10800	-99	86450	7020000	556000	65400000	-99	317000
VP3 5 Sport	3	5	Sport	2.73611e+07	3.79505e+07	3.04038e+06	1.1079e+07	9.84045e+07	1.4295e+07	140702	5.18071e+07	3.71953e+06	1.51323e+06	3.60166e+06	1.10081e+07	25914349	8.49391e+07	7.35978e+06	7150000	-99	7200	-99	61200	7425000	242000	77700000	-99	469000
VP3 6 Sport	3	6	Sport	22986024	2.96386e+07	2.91251e+06	1.38366e+07	8.16574e+07	22667389	72154.7	5.10676e+07	2.1903e+06	1.98389e+06	4.65747e+06	6.37486e+06	2.07805e+07	2.70796e+07	4.6648e+06	4320000	-99	7200	-99	46850	6930000	162000	37450000	-99	436500
VP4 2 TSST	4	2	TSST	4000000	1000000	21646	5000000	20000000	332865	72362	7000000	267739	50508	723620	10000000	5000000	593368	4000000	2000000	50000000	7236.2	64939	79598	2000000	36077	955179	253267	130252
VP4 3 TSST	4	3	TSST	8000000	2000000	7236.2	9000000	50000000	955179	21709	10000000	505083	65126	880287	10000000	10000000	2000000	5000000	3000000	100000000	28862	43417	151525	2000000	86834	2000000	274976	238795
VP4 4 TSST	4	4	TSST	6000000	1000000	0	7000000	20000000	578896	0	10000000	566050	50508	528243	10000000	6000000	2000000	3000000	2000000	70000000	43542	36077	72362	2000000	28945	2000000	159196	137488
VP4 5 TSST	4	5	TSST	8000000	701911	21771	10000000	20000000	325629	7236.2	10000000	195377	108856	476221	9000000	6000000	2000000	3000000	1000000	90000000	7236.2	65313	108232	2000000	21709	1000000	108543	195377
VP4 6 TSST	4	6	TSST	6000000	988519	0	10000000	20000000	137488	7236.2	10000000	259757	50653	687439	8000000	7000000	767037	4000000	1000000	90000000	14431	36181	101307	1000000	7236.2	1000000	209850	238795
VP4 2 Sport	4	2	Sport	7000000	636786	0	20000000	30000000	354574	0	10000000	115779	36181	1000000	8000000	7000000	1000000	3000000	952442	100000000	0	28945	202033	2000000	21646	767037	79598	159196
VP4 3 Sport	4	3	Sport	10000000	10000000	0	30000000	60000000	2000000	21709	20000000	2000000	137884	1000000	10000000	20000000	5000000	20000000	5000000	100000000	28945	116113	340101	5000000	87085	3000000	998596	397991
VP4 4 Sport	4	4	Sport	20000000	5000000	0	30000000	70000000	1000000	0	20000000	1000000	101017	709148	10000000	20000000	3000000	8000000	3000000	100000000	28945	223679	441408	4000000	101017	2000000	223679	259757
VP4 5 Sport	4	5	Sport	10000000	904525	0	20000000	60000000	505083	14472	20000000	528243	36181	562806	10000000	10000000	2000000	6000000	2000000	100000000	28945	159196	194818	3000000	43293	1000000	137488	115779
VP4 6 Sport	4	6	Sport	8000000	2000000	7215.5	10000000	40000000	353558	7236.2	10000000	318393	43293	542715	6000000	10000000	2000000	5000000	2000000	100000000	0	72155	43417	2000000	14472	1000000	137488	115779
VP5 2 TSST	5	2	TSST	7000000	10000000	296684	3000000	5000000	158740	21709	10000000	209249	72362	1000000	1000000	5000000	1000000	1000000	1000000	50000000	0	86834	65126	1000000	36077	3000000	173669	209850
VP5 3 TSST	5	3	TSST	6000000	40000000	353558	5000000	8000000	166433	21709	10000000	259757	158740	2000000	2000000	5000000	535479	2000000	2000000	40000000	7215.5	43293	57890	1000000	28945	2000000	383519	376282
VP5 4 TSST	5	4	TSST	10000000	20000000	441408	9000000	10000000	340101	123015	30000000	506534	246031	4000000	2000000	7000000	5000000	2000000	2000000	100000000	123015	600605	101307	2000000	86834	3000000	231558	209850
VP5 5 TSST	5	5	TSST	10000000	20000000	390755	10000000	20000000	267739	79828	20000000	405227	173669	5000000	2000000	10000000	1000000	1000000	1000000	100000000	50653	477589	43417	2000000	72362	2000000	246740	174169
VP5 6 TSST	5	6	TSST	20000000	20000000	651258	10000000	20000000	123015	0	40000000	571660	231558	7000000	2000000	10000000	687439	829779	2000000	100000000	50653	738092	137488	2000000	58056	2000000	144309	86586
VP5 2 Sport	5	2	Sport	20000000	30000000	926234	20000000	40000000	317481	36077	40000000	629549	209850	8000000	3000000	20000000	714331	865856	3000000	100000000	36181	202614	79828	3000000	79598	3000000	115447	30000000
VP5 3 Sport	5	3	Sport	40000000	60000000	629549	40000000	40000000	4000000	21646	70000000	3000000	846636	10000000	8000000	20000000	9000000	4000000	6000000	200000000	28862	571660	217086	5000000	181426	30000000	743193	50000000
VP5 4 Sport	5	4	Sport	40000000	40000000	1000000	40000000	50000000	1000000	36181	70000000	4000000	878104	10000000	8000000	20000000	3000000	5000000	6000000	200000000	64939	283025	137884	5000000	231558	7000000	665730	50000000
VP5 5 Sport	5	5	Sport	30000000	30000000	376282	20000000	30000000	803218	79370	40000000	1000000	600605	9000000	5000000	20000000	2000000	2000000	4000000	200000000	21646	108543	79598	6000000	79828	4000000	317481	50000000
VP5 6 Sport	5	6	Sport	20000000	40000000	361810	20000000	50000000	1000000	50508	30000000	1000000	1000000	10000000	3000000	30000000	8000000	2000000	2000000	100000000	7215.5	57890	159196	3000000	130252	10000000	122663	30000000
VP6 2 TSST	6	2	TSST	10000000	20000000	441408	9000000	10000000	340101	123015	30000000	506534	246031	4000000	2000000	7000000	5000000	2000000	2000000	100000000	123015	600605	101307	2000000	86834	3000000	231558	209850
VP6 3 TSST	6	3	TSST	10000000	20000000	390755	10000000	20000000	267739	79828	20000000	405227	173669	5000000	2000000	10000000	1000000	1000000	1000000	100000000	50653	477589	43417	2000000	72362	2000000	246740	174169
VP6 4 TSST	6	4	TSST	20000000	20000000	651258	10000000	20000000	123015	0	40000000	571660	231558	7000000	2000000	10000000	687439	829779	2000000	100000000	50653	738092	137488	2000000	58056	2000000	144309	86586
VP6 5 TSST	6	5	TSST	20000000	30000000	926234	20000000	40000000	317481	36077	40000000	629549	209850	8000000	3000000	20000000	714331	865856	3000000	100000000	36181	202614	79828	3000000	79598	3000000	115447	30000000
VP6 6 TSST	6	6	TSST	40000000	60000000	629549	40000000	40000000	4000000	21646	70000000	3000000	846636	10000000	8000000	20000000	9000000	4000000	6000000	200000000	28862	571660	217086	5000000	181426	30000000	743193	50000000
VP6 2 Sport	6	2	Sport	40000000	40000000	1000000	40000000	50000000	1000000	36181	70000000	4000000	878104	10000000	8000000	20000000	3000000	5000000	6000000	200000000	64939	283025	137884	5000000	231558	7000000	665730	50000000
VP6 3 Sport	6	3	Sport	30000000	30000000	376282	20000000	30000000	803218	79370	40000000	1000000	600605	9000000	5000000	20000000	2000000	2000000	4000000	200000000	21646	108543	79598	6000000	79828	4000000	317481	50000000
VP6 4 Sport	6	4	Sport	20000000	40000000	361810	20000000	50000000	1000000	50508	30000000	1000000	1000000	10000000	3000000	30000000	8000000	2000000	2000000	100000000	7215.5	57890	159196	3000000	130252	10000000	122663	30000000
VP6 5 Sport	6	5	Sport	5000000	955179	159196	3000000	3000000	151525	7236.2	7000000	188141	28945	346342	3000000	10000000	2000000	7000000	2000000	10000000	0	21709	93801	2000000	232226	2000000	311157	2000000
VP6 6 Sport	6	6	Sport	5000000	2000000	174169	730856	1000000	223679	7236.2	7000000	159655	21771	2000000	1000000	6000000	663823	5000000	998596	20000000	0	14514	14472	716384	137094	3000000	231558	767037
VP7 2 TSST	7	2	TSST	3000000	3000000	665730	2000000	2000000	123015	14472	5000000	144724	101307	1000000	921646	3000000	397991	2000000	689420	5000000	0	36181	36077	3000000	58056	593368	209850	347338
VP7 3 TSST	7	3	TSST	5000000	1000000	1000000	4000000	2000000	326567	21646	7000000	152398	115779	2000000	820047	3000000	653135	2000000	718448	3000000	0	36181	65126	609593	50653	2000000	389635	707116
VP7 4 TSST	7	4	TSST	5000000	2000000	1000000	3000000	1000000	173669	7236.2	6000000	79598	65126	3000000	615077	2000000	470353	969651	571660	4000000	14472	43417	79598	332865	14472	839399	130252	1000000
VP7 5 TSST	7	5	TSST	3000000	651258	868344	2000000	636786	137488	0	5000000	79598	79598	2000000	671038	2000000	325629	1000000	396851	4000000	0	108543	50653	303050	36181	629549	187602	375204
VP7 6 TSST	7	6	TSST	4000000	786486	622313	3000000	1000000	165956	14472	6000000	72155	79598	2000000	730856	2000000	497867	1000000	448644	4000000	0	36181	28945	455881	50653	779270	282212	253267
VP7 2 Sport	7	2	Sport	7000000	3000000	1000000	5000000	2000000	246031	0	10000000	115779	165956	2000000	1000000	3000000	1000000	3000000	1000000	4000000	7236.2	36077	50653	469005	115447	2000000	803218	709148
VP7 3 Sport	7	3	Sport	30000000	1000000	2000000	10000000	4000000	332865	7236.2	30000000	339127	223679	4000000	2000000	3000000	2000000	7000000	3000000	7000000	0	288619	144724	933470	558793	3000000	2000000	940706
VP7 4 Sport	7	4	Sport	10000000	3000000	894718	6000000	2000000	406395	0	20000000	230895	165956	2000000	2000000	2000000	3000000	4000000	1000000	5000000	0	129878	86338	521006	101017	2000000	916364	844210
VP7 5 Sport	7	5	Sport	5000000	2000000	361810	3000000	1000000	390755	7236.2	9000000	94071	151960	1000000	1000000	2000000	2000000	2000000	1000000	4000000	0	72362	94071	399138	564424	2000000	296684	564424
VP7 6 Sport	7	6	Sport	5000000	2000000	318393	3000000	1000000	130252	14472	8000000	108543	137488	2000000	966873	2000000	716384	2000000	887502	5000000	0	36181	65126	454574	64939	1000000	318393	557187
VP8 2 TSST	8	2	TSST	4000000	115779	115447	853872	1000000	911761	28945	8000000	231558	1000000	3000000	6000000	3000000	2000000	2000000	672967	50000000	0	7215.5	28945	976887	28945	2000000	151960	448644
VP8 3 TSST	8	3	TSST	5000000	354574	434172	2000000	2000000	521006	14472	10000000	231558	2000000	7000000	8000000	4000000	528243	3000000	1000000	50000000	0	7236.2	36181	1000000	21646	2000000	166433	123015
VP8 4 TSST	8	4	TSST	4000000	432928	238110	1000000	2000000	718448	28945	9000000	238110	1000000	4000000	9000000	4000000	1000000	2000000	1000000	50000000	0	21646	28862	2000000	7215.5	3000000	94071	115779
VP8 5 TSST	8	5	TSST	4000000	266972	295834	1000000	2000000	230895	36077	9000000	266972	1000000	5000000	8000000	4000000	266972	2000000	1000000	60000000	0	14431	28862	2000000	21646	822563	101017	202033
VP8 6 TSST	8	6	TSST	7000000	1000000	404066	6000000	20000000	3000000	303920	30000000	752565	4000000	30000000	10000000	20000000	795982	3000000	2000000	50000000	72362	36077	72362	50000000	419700	2000000	130252	1000000
VP8 2 Sport	8	2	Sport	10000000	447359	432928	2000000	20000000	4000000	36181	30000000	642177	9000000	20000000	20000000	10000000	2000000	2000000	2000000	60000000	14431	28862	79598	50000000	101307	4000000	94071	86834
VP8 3 Sport	8	3	Sport	30000000	10000000	1000000	10000000	40000000	2000000	43417	60000000	2000000	10000000	20000000	20000000	30000000	981303	20000000	6000000	50000000	7236.2	281403	65126	20000000	499298	5000000	976887	195377
VP8 4 Sport	8	4	Sport	30000000	10000000	865856	6000000	30000000	1000000	21709	70000000	2000000	10000000	20000000	20000000	20000000	1000000	9000000	7000000	60000000	14431	194818	65126	50000000	253997	3000000	586132	260503
VP8 5 Sport	8	5	Sport	10000000	2000000	441408	3000000	20000000	1000000	43417	40000000	709148	8000000	20000000	10000000	20000000	738092	4000000	3000000	50000000	0	36181	36181	60000000	108543	2000000	296684	202614
VP8 6 Sport	8	6	Sport	10000000	8000000	289448	2000000	20000000	1000000	21709	40000000	846636	8000000	20000000	10000000	20000000	506534	3000000	2000000	60000000	0	57890	28862	20000000	108856	2000000	166433	217086
VP9 2 TSST	9	2	TSST	20000000	90000000	10000000	100000000	80000000	200000000	224322	40000000	20000000	340101	200000000	20000000	6000000	20000000	3000000	5000000	50000000	14472	108543	2000000	700000000	101307	2000000	200000000	10000000
VP9 3 TSST	9	3	TSST	30000000	60000000	20000000	100000000	70000000	200000000	303920	50000000	30000000	575588	100000000	20000000	4000000	30000000	5000000	4000000	60000000	21771	223040	3000000	300000000	173669	3000000	200000000	10000000
VP9 4 TSST	9	4	TSST	20000000	80000000	5000000	100000000	80000000	100000000	116113	20000000	4000000	209249	200000000	10000000	3000000	20000000	3000000	981303	100000000	86834	36077	309379	60000000	86834	1000000	50000000	20000000
VP9 5 TSST	9	5	TSST	10000000	80000000	3000000	100000000	70000000	200000000	65126	20000000	3000000	209249	200000000	10000000	2000000	30000000	3000000	916364	100000000	57724	57724	332865	50000000	21585	2000000	70000000	10000000
VP9 6 TSST	9	6	TSST	10000000	90000000	5000000	100000000	90000000	200000000	129878	20000000	4000000	295834	200000000	10000000	3000000	30000000	3000000	865856	90000000	21709	43293	404066	80000000	94071	2000000	70000000	10000000
VP9 2 Sport	9	2	Sport	20000000	80000000	4000000	100000000	90000000	100000000	72155	20000000	4000000	151960	200000000	20000000	3000000	20000000	4000000	1000000	90000000	21646	101307	651258	90000000	43417	3000000	200000000	10000000
VP9 3 Sport	9	3	Sport	30000000	100000000	8000000	100000000	100000000	200000000	87085	50000000	70000000	642177	200000000	40000000	4000000	60000000	20000000	5000000	80000000	36077	671038	1000000	300000000	238795	3000000	400000000	10000000
VP9 4 Sport	9	4	Sport	40000000	100000000	6000000	200000000	100000000	200000000	123370	60000000	70000000	477589	200000000	50000000	6000000	70000000	20000000	6000000	80000000	21709	926234	1000000	300000000	188141	4000000	400000000	10000000
VP9 5 Sport	9	5	Sport	30000000	90000000	7000000	100000000	100000000	200000000	86834	40000000	30000000	217086	200000000	30000000	4000000	70000000	7000000	3000000	80000000	36077	209850	665730	200000000	101307	3000000	300000000	10000000
VP9 6 Sport	9	6	Sport	20000000	60000000	4000000	100000000	90000000	200000000	57724	30000000	8000000	202033	200000000	30000000	4000000	50000000	5000000	2000000	80000000	14431	187602	448644	200000000	93801	4000000	200000000	10000000
VP10 2 TSST	10	2	TSST	7000000	3000000	781510	5000000	2000000	30000000	600605	30000000	40000000	3000000	100000000	90000000	20000000	50000000	20000000	3000000	300000000	14472	50653	43169	100000000	14431	2000000	80000000	9000000
VP10 3 TSST	10	3	TSST	7000000	4000000	839399	6000000	4000000	40000000	644022	30000000	40000000	4000000	200000000	100000000	20000000	60000000	40000000	5000000	300000000	0	50653	57724	100000000	50653	2000000	100000000	7000000
VP10 4 TSST	10	4	TSST	5000000	3000000	788746	3000000	3000000	20000000	412463	20000000	30000000	4000000	100000000	90000000	20000000	50000000	20000000	3000000	300000000	7236.2	144724	79598	100000000	65313	1000000	90000000	6000000
VP10 5 TSST	10	5	TSST	10000000	3000000	1000000	5000000	2000000	20000000	600605	40000000	40000000	4000000	100000000	90000000	20000000	50000000	30000000	3000000	400000000	57724	238795	115447	100000000	57890	1000000	100000000	8000000
VP10 6 TSST	10	6	TSST	10000000	8000000	631364	10000000	10000000	100000000	716384	60000000	80000000	10000000	200000000	90000000	40000000	70000000	80000000	6000000	200000000	50799	312053	194818	200000000	123370	2000000	300000000	6000000
VP10 2 Sport	10	2	Sport	10000000	20000000	1000000	20000000	10000000	200000000	962415	70000000	80000000	30000000	200000000	100000000	40000000	100000000	100000000	10000000	200000000	64939	406395	360773	200000000	94071	5000000	300000000	7000000
VP10 3 Sport	10	3	Sport	50000000	30000000	3000000	40000000	30000000	90000000	2000000	100000000	100000000	60000000	200000000	200000000	60000000	40000000	200000000	20000000	200000000	216464	2000000	2000000	300000000	600605	3000000	300000000	7000000
VP10 4 Sport	10	4	Sport	60000000	30000000	2000000	30000000	30000000	100000000	2000000	100000000	100000000	50000000	200000000	100000000	50000000	50000000	100000000	20000000	100000000	129878	2000000	699900	200000000	469005	5000000	200000000	6000000
VP10 5 Sport	10	5	Sport	30000000	20000000	2000000	30000000	30000000	100000000	1000000	100000000	90000000	40000000	200000000	100000000	60000000	40000000	90000000	10000000	200000000	64939	1000000	533945	200000000	303920	3000000	200000000	4000000
VP10 6 Sport	10	6	Sport	20000000	30000000	1000000	20000000	20000000	100000000	998596	80000000	90000000	30000000	200000000	100000000	50000000	60000000	100000000	10000000	100000000	79370	1000000	274976	200000000	295834	3000000	200000000	6000000
VP11 2 TSST	11	2	TSST	8000000	30000000	1000000	20000000	20000000	40000000	14472	30000000	562806	202614	2000000	6000000	4000000	2000000	5000000	4000000	60000000	7215.5	159196	144309	50000000	173171	20000000	1000000	246031
VP11 3 TSST	11	3	TSST	9000000	30000000	3000000	20000000	20000000	70000000	21709	30000000	571660	441408	2000000	8000000	5000000	1000000	8000000	7000000	60000000	7236.2	332865	86586	60000000	347338	20000000	2000000	246031
VP11 4 TSST	11	4	TSST	8000000	30000000	2000000	20000000	20000000	60000000	43417	30000000	442680	188141	2000000	6000000	4000000	882817	6000000	4000000	60000000	7257.1	202614	123015	40000000	281403	20000000	1000000	347338
VP11 5 TSST	11	5	TSST	8000000	30000000	2000000	20000000	20000000	50000000	36181	30000000	246031	332865	2000000	7000000	5000000	1000000	4000000	5000000	50000000	21709	195377	144724	40000000	260503	20000000	1000000	195377
VP11 6 TSST	11	6	TSST	6000000	20000000	2000000	20000000	30000000	30000000	43293	30000000	391881	375204	2000000	9000000	6000000	4000000	5000000	6000000	70000000	29028	129878	101017	50000000	324696	20000000	1000000	375204
VP11 2 Sport	11	2	Sport	5000000	20000000	1000000	20000000	30000000	70000000	79598	30000000	426936	325629	2000000	10000000	7000000	1000000	6000000	6000000	50000000	28945	173669	36181	40000000	463117	20000000	2000000	463117
VP11 3 Sport	11	3	Sport	10000000	20000000	2000000	10000000	8000000	10000000	7236.2	20000000	570022	521006	897289	7000000	1000000	253267	10000000	8000000	3000000	0	267739	123015	4000000	613315	6000000	3000000	101307
VP11 4 Sport	11	4	Sport	20000000	60000000	2000000	10000000	9000000	20000000	0	20000000	779270	347338	2000000	9000000	2000000	303920	10000000	8000000	2000000	0	123015	123015	5000000	578896	10000000	2000000	173171
VP11 5 Sport	11	5	Sport	10000000	20000000	926234	8000000	7000000	10000000	7236.2	10000000	238110	108543	2000000	7000000	1000000	230895	6000000	6000000	2000000	0	28945	94071	4000000	217086	8000000	795982	108543
VP11 6 Sport	11	6	Sport	10000000	10000000	1000000	8000000	7000000	9000000	0	10000000	253267	224322	2000000	5000000	1000000	152398	5000000	4000000	2000000	0	86834	72362	3000000	173669	5000000	622313	144724
VP12 2 TSST	12	2	TSST	10000000	728762	2000000	3000000	159196	555591	0	10000000	115447	108232	1000000	1000000	1000000	72155	901933	853872	2000000	0	36077	28945	448644	57890	815348	274188	108232
VP12 3 TSST	12	3	TSST	20000000	2000000	3000000	4000000	217086	2000000	14472	20000000	137488	137094	1000000	1000000	1000000	311157	1000000	1000000	3000000	0	57724	57890	629549	94071	2000000	282212	137488
VP12 4 TSST	12	4	TSST	10000000	476221	2000000	3000000	129878	2000000	0	10000000	115447	123015	1000000	1000000	938011	969651	918998	940706	3000000	0	50653	36077	542715	50508	1000000	253267	137488
VP12 5 TSST	12	5	TSST	10000000	824927	3000000	3000000	209850	745329	0	10000000	159196	187602	1000000	1000000	861108	173669	947942	663823	3000000	0	129878	50653	461790	65126	962415	253267	123015
VP12 6 TSST	12	6	TSST	9000000	680203	1000000	2000000	122663	2000000	0	10000000	166433	144724	846636	1000000	930795	376282	945226	1000000	5000000	0	50653	72362	477589	137094	1000000	375204	158740
VP12 2 Sport	12	2	Sport	20000000	890053	5000000	9000000	324696	3000000	14472	30000000	130252	57724	2000000	1000000	887502	158740	1000000	2000000	6000000	0	28862	72362	600605	158740	2000000	492062	202614
VP12 3 Sport	12	3	Sport	30000000	5000000	5000000	9000000	772055	3000000	0	40000000	598884	202614	972445	3000000	1000000	144724	4000000	4000000	6000000	0	260503	72571	1000000	324696	3000000	2000000	159196
VP12 4 Sport	12	4	Sport	30000000	6000000	4000000	10000000	933470	5000000	14431	40000000	497867	253267	2000000	3000000	1000000	397991	5000000	4000000	8000000	0	282212	166433	1000000	311157	4000000	3000000	158740
VP12 5 Sport	12	5	Sport	20000000	7000000	3000000	7000000	2000000	30000000	65126	30000000	455881	159196	2000000	2000000	2000000	389635	2000000	2000000	50000000	7236.2	282212	50508	1000000	231558	3000000	709148	166433
VP12 6 Sport	12	6	Sport	10000000	5000000	2000000	7000000	1000000	30000000	14472	30000000	528243	151525	2000000	2000000	1000000	296684	2000000	2000000	60000000	0	194818	79370	933470	166433	3000000	535479	130252
VP13 2 TSST	13	2	TSST	10000000	100000000	947942	30000000	0	2000000	7236.2	30000000	361810	151960	4000000	3000000	0	745329	1000000	933470	20000000	0	79598	129878	3000000	0	745329	144724	151960
VP13 3 TSST	13	3	TSST	10000000	200000000	1000000	60000000	90000000	4000000	7236.2	40000000	795982	123015	6000000	5000000	20000000	795982	3000000	2000000	40000000	0	115779	709148	4000000	94071	1000000	455881	166433
VP13 4 TSST	13	4	TSST	10000000	100000000	861108	40000000	70000000	2000000	21646	30000000	535479	130252	4000000	3000000	20000000	1000000	2000000	1000000	30000000	0	123015	260503	3000000	64939	1000000	324696	202033
VP13 5 TSST	13	5	TSST	10000000	100000000	687439	50000000	80000000	3000000	50508	30000000	506534	180905	4000000	3000000	20000000	764839	2000000	832163	30000000	0	159196	332865	3000000	72362	981303	245326	216464
VP13 6 TSST	13	6	TSST	10000000	100000000	890053	40000000	90000000	2000000	14472	30000000	434172	173669	2000000	3000000	20000000	2000000	2000000	803218	30000000	0	144724	122663	3000000	72155	1000000	274976	130252
VP13 2 Sport	13	2	Sport	10000000	100000000	665730	50000000	70000000	2000000	21646	30000000	513770	195377	5000000	5000000	20000000	1000000	2000000	2000000	30000000	0	101307	375204	10000000	86834	2000000	375204	137094
VP13 3 Sport	13	3	Sport	20000000	7000000	3000000	7000000	2000000	30000000	65126	30000000	455881	159196	2000000	2000000	2000000	389635	2000000	2000000	50000000	7236.2	282212	50508	1000000	231558	3000000	709148	166433
VP13 4 Sport	13	4	Sport	10000000	5000000	2000000	7000000	1000000	30000000	14472	30000000	528243	151525	2000000	2000000	1000000	296684	2000000	2000000	60000000	0	194818	79370	933470	166433	3000000	535479	130252
VP13 5 Sport	13	5	Sport	10000000	100000000	947942	30000000	0	2000000	7236.2	30000000	361810	151960	4000000	3000000	0	745329	1000000	933470	20000000	0	79598	129878	3000000	0	745329	144724	151960
VP13 6 Sport	13	6	Sport	10000000	200000000	1000000	60000000	90000000	4000000	7236.2	40000000	795982	123015	6000000	5000000	20000000	795982	3000000	2000000	40000000	0	115779	709148	4000000	94071	1000000	455881	166433
VP14 2 TSST	14	2	TSST	10000000	100000000	861108	40000000	70000000	2000000	21646	30000000	535479	130252	4000000	3000000	20000000	1000000	2000000	1000000	30000000	0	123015	260503	3000000	64939	1000000	324696	202033
VP14 3 TSST	14	3	TSST	10000000	100000000	687439	50000000	80000000	3000000	50508	30000000	506534	180905	4000000	3000000	20000000	764839	2000000	832163	30000000	0	159196	332865	3000000	72362	981303	245326	216464
VP14 4 TSST	14	4	TSST	10000000	100000000	890053	40000000	90000000	2000000	14472	30000000	434172	173669	2000000	3000000	20000000	2000000	2000000	803218	30000000	0	144724	122663	3000000	72155	1000000	274976	130252
VP14 5 TSST	14	5	TSST	10000000	100000000	665730	50000000	70000000	2000000	21646	30000000	513770	195377	5000000	5000000	20000000	1000000	2000000	2000000	30000000	0	101307	375204	10000000	86834	2000000	375204	137094
VP14 6 TSST	14	6	TSST	10000000	1000000	2000000	4000000	2000000	916364	7236.2	20000000	14431	94071	1000000	4000000	2000000	829779	1000000	1000000	267739	0	397991	72362	2000000	86834	4000000	202614	578896
VP14 2 Sport	14	2	Sport	5000000	1000000	752565	5000000	3000000	519514	14514	10000000	115779	94071	3000000	4000000	3000000	425713	1000000	2000000	461790	7236.2	57890	108543	2000000	43293	2000000	181426	740220
VP14 3 Sport	14	3	Sport	20000000	5000000	2000000	9000000	8000000	5000000	0	40000000	259757	209850	3000000	10000000	3000000	2000000	5000000	5000000	274976	0	564424	188141	4000000	341082	3000000	1000000	506534
VP14 4 Sport	14	4	Sport	30000000	6000000	1000000	10000000	8000000	484825	7257.1	50000000	389635	289448	3000000	10000000	4000000	774273	4000000	5000000	463117	0	296684	202614	3000000	324696	3000000	2000000	892618
VP14 5 Sport	14	5	Sport	30000000	40000000	1000000	20000000	50000000	1000000	288619	80000000	976887	267739	20000000	10000000	10000000	873071	3000000	4000000	40000000	21709	861108	151960	5000000	260503	2000000	656607	591668
VP14 6 Sport	14	6	Sport	20000000	20000000	945226	20000000	30000000	998596	71949	70000000	549951	245326	20000000	10000000	8000000	738092	1000000	2000000	50000000	0	194818	101307	4000000	188141	2000000	172676	115118
VP15 2 TSST	15	2	TSST	30000000	100000000	2000000	70000000	30000000	100000000	43417	50000000	151960	129878	30000000	4000000	40000000	6000000	3000000	3000000	50000000	10000000	310265	2000000	20000000	5000000	5000000	861108	2000000
VP15 3 TSST	15	3	TSST	30000000	100000000	1000000	70000000	40000000	200000000	86834	50000000	173669	72362	20000000	2000000	40000000	6000000	2000000	1000000	60000000	9000000	752565	1000000	20000000	4000000	5000000	904525	1000000
VP15 4 TSST	15	4	TSST	30000000	100000000	2000000	60000000	30000000	200000000	36181	50000000	245326	158740	30000000	3000000	30000000	20000000	1000000	1000000	50000000	20000000	447359	3000000	20000000	3000000	7000000	578896	795982
VP15 5 TSST	15	5	TSST	20000000	100000000	1000000	60000000	30000000	100000000	28862	40000000	151525	86586	20000000	2000000	30000000	4000000	1000000	1000000	50000000	8000000	685469	634961	20000000	3000000	4000000	483436	692685
VP15 6 TSST	15	6	TSST	20000000	100000000	1000000	70000000	30000000	100000000	43417	50000000	202033	180905	50000000	3000000	30000000	6000000	2000000	2000000	40000000	6000000	340101	6000000	30000000	3000000	5000000	2000000	180905
VP15 2 Sport	15	2	Sport	20000000	90000000	1000000	60000000	30000000	200000000	28945	40000000	93801	108543	20000000	3000000	30000000	10000000	1000000	2000000	40000000	20000000	361810	984123	20000000	3000000	5000000	759801	2000000
VP15 3 Sport	15	3	Sport	30000000	40000000	1000000	20000000	50000000	1000000	288619	80000000	976887	267739	20000000	10000000	10000000	873071	3000000	4000000	40000000	21709	861108	151960	5000000	260503	2000000	656607	591668
VP15 4 Sport	15	4	Sport	20000000	20000000	945226	20000000	30000000	998596	71949	70000000	549951	245326	20000000	10000000	8000000	738092	1000000	2000000	50000000	0	194818	101307	4000000	188141	2000000	172676	115118
VP15 5 Sport	15	5	Sport	30000000	100000000	2000000	70000000	30000000	100000000	43417	50000000	151960	129878	30000000	4000000	40000000	6000000	3000000	3000000	50000000	10000000	310265	2000000	20000000	5000000	5000000	861108	2000000
VP15 6 Sport	15	6	Sport	30000000	100000000	1000000	70000000	40000000	200000000	86834	50000000	173669	72362	20000000	2000000	40000000	6000000	2000000	1000000	60000000	9000000	752565	1000000	20000000	4000000	5000000	904525	1000000
VP16 2 TSST	16	2	TSST	30000000	100000000	2000000	60000000	30000000	200000000	36181	50000000	245326	158740	30000000	3000000	30000000	20000000	1000000	1000000	50000000	20000000	447359	3000000	20000000	3000000	7000000	578896	795982
VP16 3 TSST	16	3	TSST	20000000	100000000	1000000	60000000	30000000	100000000	28862	40000000	151525	86586	20000000	2000000	30000000	4000000	1000000	1000000	50000000	8000000	685469	634961	20000000	3000000	4000000	483436	692685
VP16 4 TSST	16	4	TSST	20000000	100000000	1000000	70000000	30000000	100000000	43417	50000000	202033	180905	50000000	3000000	30000000	6000000	2000000	2000000	40000000	6000000	340101	6000000	30000000	3000000	5000000	2000000	180905
VP16 5 TSST	16	5	TSST	20000000	90000000	1000000	60000000	30000000	200000000	28945	40000000	93801	108543	20000000	3000000	30000000	10000000	1000000	2000000	40000000	20000000	361810	984123	20000000	3000000	5000000	759801	2000000
VP16 6 TSST	16	6	TSST	2000000	2000000	486223	2000000	9000000	548375	180387	9000000	188141	174169	663823	2000000	10000000	137094	2000000	738092	914389	0	203198	43293	60000000	28945	909149	144309	129878
VP16 2 Sport	16	2	Sport	3000000	2000000	962415	4000000	10000000	3000000	209850	10000000	180387	151960	1000000	2000000	10000000	644022	2000000	1000000	989812	0	72362	43417	100000000	57890	3000000	173669	151960
VP16 3 Sport	16	3	Sport	30000000	20000000	4000000	20000000	40000000	20000000	325629	50000000	1000000	441408	2000000	6000000	50000000	1000000	8000000	6000000	3000000	0	463117	108543	100000000	658494	7000000	1000000	173669
VP16 4 Sport	16	4	Sport	30000000	30000000	2000000	10000000	30000000	10000000	137488	50000000	1000000	406395	1000000	8000000	40000000	353558	7000000	7000000	2000000	0	420909	217086	200000000	339127	8000000	984123	188141
VP16 5 Sport	16	5	Sport	20000000	10000000	2000000	7000000	20000000	4000000	600605	40000000	1000000	324696	938011	5000000	30000000	230895	5000000	4000000	3000000	14431	707116	129878	300000000	651258	3000000	607841	303920
VP16 6 Sport	16	6	Sport	6000000	10000000	926234	8000000	20000000	2000000	202614	30000000	557187	260503	955179	3000000	30000000	274188	3000000	2000000	3000000	0	332865	115779	100000000	173669	2000000	217086	130252
VP17 2 TSST	17	2	TSST	5000000	20000000	1000000	30000000	20000000	200000000	1000000	30000000	745329	224322	80000000	2000000	5000000	1000000	3000000	2000000	20000000	0	65126	123015	200000000	43293	865856	2000000	20000000
VP17 3 TSST	17	3	TSST	10000000	30000000	2000000	20000000	30000000	300000000	1000000	50000000	2000000	346342	60000000	4000000	9000000	3000000	5000000	4000000	20000000	0	101017	188141	80000000	137488	2000000	5000000	20000000
VP17 4 TSST	17	4	TSST	6000000	30000000	1000000	10000000	20000000	200000000	728762	30000000	1000000	209850	40000000	3000000	8000000	1000000	3000000	3000000	20000000	7215.5	14472	36181	200000000	123015	829779	5000000	20000000
VP17 5 TSST	17	5	TSST	7000000	30000000	2000000	10000000	30000000	200000000	832163	30000000	966873	194818	40000000	2000000	8000000	2000000	3000000	1000000	20000000	0	72155	50508	70000000	101307	1000000	4000000	20000000
VP17 6 TSST	17	6	TSST	5000000	20000000	1000000	20000000	20000000	200000000	938011	30000000	714331	166433	50000000	2000000	7000000	1000000	3000000	1000000	20000000	21646	65126	151960	70000000	57890	1000000	2000000	20000000
VP17 2 Sport	17	2	Sport	7000000	20000000	714331	20000000	20000000	200000000	412463	30000000	2000000	216464	70000000	4000000	8000000	1000000	5000000	3000000	20000000	0	50508	303920	200000000	144309	1000000	20000000	20000000
VP17 3 Sport	17	3	Sport	20000000	10000000	2000000	7000000	20000000	4000000	600605	40000000	1000000	324696	938011	5000000	30000000	230895	5000000	4000000	3000000	14431	707116	129878	300000000	651258	3000000	607841	303920
VP17 4 Sport	17	4	Sport	6000000	10000000	926234	8000000	20000000	2000000	202614	30000000	557187	260503	955179	3000000	30000000	274188	3000000	2000000	3000000	0	332865	115779	100000000	173669	2000000	217086	130252
VP17 5 Sport	17	5	Sport	5000000	20000000	1000000	30000000	20000000	200000000	1000000	30000000	745329	224322	80000000	2000000	5000000	1000000	3000000	2000000	20000000	0	65126	123015	200000000	43293	865856	2000000	20000000
VP17 6 Sport	17	6	Sport	10000000	30000000	2000000	20000000	30000000	300000000	1000000	50000000	2000000	346342	60000000	4000000	9000000	3000000	5000000	4000000	20000000	0	101017	188141	80000000	137488	2000000	5000000	20000000
VP18 2 TSST	18	2	TSST	6000000	30000000	1000000	10000000	20000000	200000000	728762	30000000	1000000	209850	40000000	3000000	8000000	1000000	3000000	3000000	20000000	7215.5	14472	36181	200000000	123015	829779	5000000	20000000
VP18 3 TSST	18	3	TSST	7000000	30000000	2000000	10000000	30000000	200000000	832163	30000000	966873	194818	40000000	2000000	8000000	2000000	3000000	1000000	20000000	0	72155	50508	70000000	101307	1000000	4000000	20000000
VP18 4 TSST	18	4	TSST	5000000	20000000	1000000	20000000	20000000	200000000	938011	30000000	714331	166433	50000000	2000000	7000000	1000000	3000000	1000000	20000000	21646	65126	151960	70000000	57890	1000000	2000000	20000000
VP18 5 TSST	18	5	TSST	7000000	20000000	714331	20000000	20000000	200000000	412463	30000000	2000000	216464	70000000	4000000	8000000	1000000	5000000	3000000	20000000	0	50508	303920	200000000	144309	1000000	20000000	20000000
VP18 6 TSST	18	6	TSST	3000000	174169	180387	1000000	1000000	1000000	14472	20000000	79828	115447	0	1000000	3000000	50508	2000000	499298	10000000	0	288619	21709	1000000	43542	317481	267739	180905
VP18 2 Sport	18	2	Sport	5000000	188141	281403	2000000	2000000	2000000	14472	30000000	50653	173171	0	1000000	3000000	28945	2000000	880287	20000000	0	122663	14472	1000000	43417	571660	332865	166433
VP18 3 Sport	18	3	Sport	30000000	3000000	822563	7000000	6000000	5000000	0	70000000	312053	671038	325629	5000000	4000000	14472	5000000	4000000	60000000	7257.1	360773	65126	3000000	203198	1000000	1000000	194818
VP18 4 Sport	18	4	Sport	40000000	3000000	952442	9000000	4000000	7000000	0	90000000	347338	851425	7236.2	4000000	4000000	43417	4000000	3000000	60000000	0	728762	123015	3000000	180387	1000000	571660	130252
VP18 5 Sport	18	5	Sport	20000000	2000000	644022	3000000	4000000	7000000	123015	90000000	304796	484825	0	3000000	4000000	0	3000000	1000000	60000000	0	781510	94071	2000000	289448	2000000	282212	137488
VP18 6 Sport	18	6	Sport	10000000	1000000	557187	2000000	3000000	6000000	36181	80000000	268511	289448	0	2000000	3000000	21646	1000000	1000000	60000000	14514	2000000	21646	2000000	115779	836994	137488	94071
VP19 2 TSST	19	2	TSST	10000000	30000000	2000000	50000000	60000000	100000000	267739	70000000	210455	123015	86834	1000000	8000000	165956	839399	694675	30000000	29028	231558	36181	40000000	72362	966873	40000000	10000000
VP19 3 TSST	19	3	TSST	10000000	30000000	3000000	50000000	50000000	100000000	521006	60000000	347338	202614	50653	1000000	7000000	180905	2000000	955179	30000000	0	535479	108543	30000000	137488	1000000	50000000	20000000
VP19 4 TSST	19	4	TSST	10000000	30000000	2000000	60000000	60000000	100000000	405227	70000000	303920	151525	57890	2000000	6000000	130252	861108	988519	40000000	21709	165956	101307	40000000	72362	1000000	30000000	10000000
VP19 5 TSST	19	5	TSST	10000000	30000000	808132	50000000	60000000	90000000	513770	60000000	202033	151525	50653	1000000	8000000	93801	1000000	557187	30000000	0	144309	57890	30000000	50653	512298	40000000	20000000
VP19 6 TSST	19	6	TSST	10000000	30000000	1000000	50000000	50000000	90000000	455881	60000000	173669	108543	86834	897289	7000000	144724	1000000	463117	40000000	43417	166433	50653	20000000	36181	528243	30000000	10000000
VP19 2 Sport	19	2	Sport	8000000	30000000	2000000	50000000	50000000	100000000	499298	60000000	367989	151960	65126	1000000	5000000	209249	1000000	793701	20000000	7215.5	455881	144724	20000000	50653	1000000	40000000	20000000
VP19 3 Sport	19	3	Sport	20000000	2000000	644022	3000000	4000000	7000000	123015	90000000	304796	484825	0	3000000	4000000	0	3000000	1000000	60000000	0	781510	94071	2000000	289448	2000000	282212	137488
VP19 4 Sport	19	4	Sport	10000000	1000000	557187	2000000	3000000	6000000	36181	80000000	268511	289448	0	2000000	3000000	21646	1000000	1000000	60000000	14514	2000000	21646	2000000	115779	836994	137488	94071
VP19 5 Sport	19	5	Sport	10000000	30000000	2000000	50000000	60000000	100000000	267739	70000000	210455	123015	86834	1000000	8000000	165956	839399	694675	30000000	29028	231558	36181	40000000	72362	966873	40000000	10000000
VP19 6 Sport	19	6	Sport	10000000	30000000	3000000	50000000	50000000	100000000	521006	60000000	347338	202614	50653	1000000	7000000	180905	2000000	955179	30000000	0	535479	108543	30000000	137488	1000000	50000000	20000000
VP20 2 TSST	20	2	TSST	10000000	30000000	2000000	60000000	60000000	100000000	405227	70000000	303920	151525	57890	2000000	6000000	130252	861108	988519	40000000	21709	165956	101307	40000000	72362	1000000	30000000	10000000
VP20 3 TSST	20	3	TSST	10000000	30000000	808132	50000000	60000000	90000000	513770	60000000	202033	151525	50653	1000000	8000000	93801	1000000	557187	30000000	0	144309	57890	30000000	50653	512298	40000000	20000000
VP20 4 TSST	20	4	TSST	10000000	30000000	1000000	50000000	50000000	90000000	455881	60000000	173669	108543	86834	897289	7000000	144724	1000000	463117	40000000	43417	166433	50653	20000000	36181	528243	30000000	10000000
VP20 5 TSST	20	5	TSST	8000000	30000000	2000000	50000000	50000000	100000000	499298	60000000	367989	151960	65126	1000000	5000000	209249	1000000	793701	20000000	7215.5	455881	144724	20000000	50653	1000000	40000000	20000000
VP20 6 TSST	20	6	TSST	3000000	10000000	694675	40000000	50000000	300000000	180905	10000000	665730	123015	50000000	4000000	20000000	5000000	5000000	1000000	80000000	14472	72362	65126	50000000	86834	6000000	2000000	513770
VP20 2 Sport	20	2	Sport	10000000	20000000	3000000	50000000	60000000	300000000	14472	40000000	1000000	795982	50000000	8000000	20000000	3000000	7000000	2000000	80000000	0	144724	123015	80000000	464451	9000000	6000000	542715
VP20 3 Sport	20	3	Sport	30000000	50000000	4000000	90000000	70000000	400000000	101017	60000000	20000000	1000000	100000000	20000000	30000000	10000000	40000000	10000000	80000000	7215.5	470353	129878	100000000	303050	10000000	50000000	642177
VP20 4 Sport	20	4	Sport	20000000	50000000	3000000	70000000	70000000	300000000	57724	50000000	20000000	2000000	100000000	20000000	30000000	8000000	20000000	5000000	80000000	14472	202614	224969	100000000	188141	10000000	40000000	598884
VP20 5 Sport	20	5	Sport	20000000	40000000	4000000	50000000	70000000	300000000	361810	70000000	20000000	2000000	100000000	10000000	30000000	10000000	20000000	3000000	70000000	144309	613315	274976	100000000	295834	9000000	40000000	651258
VP20 6 Sport	20	6	Sport	10000000	40000000	3000000	50000000	60000000	300000000	230895	50000000	10000000	1000000	100000000	10000000	30000000	10000000	10000000	3000000	60000000	28945	180905	260503	100000000	202033	10000000	30000000	512298
