# Supplementary material for: Stress type–specific small extracellular vesicle signatures reflect divergent biological responses to acute psychosocial and physical challenges
Source: Sci Rep. 2025 Oct 9;15:35231. doi: 10.1038/s41598-025-21575-5 (PMC12511347; doi:10.1038/s41598-025-21575-5)
Supplement: Supplementary file 5 — Supplementary Information 5. [file 41598_2025_21575_MOESM6_ESM.xlsx]

## Sheet: Sheet1
Stress Type	sEV	Baseline	Time Point	n	t-value	df	p	p.adj	significance	Cohen's d	Lower 95% CI	Upper 95% CI
psychosocial	CD9	-2 Min	+2 Min	19	-0.523741	18	0.607	1	ns	-0.120154	-0.62	0.38
psychosocial	CD9	-2 Min	+15 Min	19	-0.151334	18	0.881	1	ns	-0.0347184	-0.49	0.47
psychosocial	CD9	-2 Min	+30 Min	19	-0.117485	18	0.908	1	ns	-0.026953	-0.57	0.47
psychosocial	CD9	-2 Min	+40 Min	19	-0.247238	18	0.808	1	ns	-0.0567202	-0.67	0.39
physical	CD9	-2 Min	+2 Min	14	-2.62744	13	0.021	0.084	ns	-0.702213	-1.53	-0.22
physical	CD9	-2 Min	+15 Min	14	-3.61314	13	0.003	0.013	*	-0.965652	-2.32	-0.43
physical	CD9	-2 Min	+30 Min	14	-1.74951	13	0.104	0.416	ns	-0.467576	-1.15	0.04
physical	CD9	-2 Min	+40 Min	14	-1.30167	13	0.216	0.864	ns	-0.347885	-1.17	0.2
psychosocial	CD13	-2 Min	+2 Min	13	-1.14625	12	0.274	1	ns	-0.317912	-0.89	0.24
psychosocial	CD13	-2 Min	+15 Min	13	-0.425493	12	0.678	1	ns	-0.118011	-0.93	0.41
psychosocial	CD13	-2 Min	+30 Min	13	-1.4014	12	0.186	0.744	ns	-0.388679	-2.57	0.12
psychosocial	CD13	-2 Min	+40 Min	13	-0.720123	12	0.485	1	ns	-0.199726	-0.91	0.41
physical	CD13	-2 Min	+2 Min	12	-3.71153	11	0.003	0.014	*	-1.07143	-2.88	-0.7
physical	CD13	-2 Min	+15 Min	12	-3.13571	11	0.009	0.038	*	-0.905201	-1.86	-0.37
physical	CD13	-2 Min	+30 Min	12	-0.813558	11	0.433	1	ns	-0.234854	-0.97	0.37
physical	CD13	-2 Min	+40 Min	12	-1.10227	11	0.294	1	ns	-0.318198	-1.34	0.25
psychosocial	CD14	-2 Min	+2 Min	8	-1.80756	7	0.114	0.456	ns	-0.63907	-1.62	0.07
psychosocial	CD14	-2 Min	+15 Min	8	0.593635	7	0.571	1	ns	0.209882	-0.53	1.17
psychosocial	CD14	-2 Min	+30 Min	8	0.805811	7	0.447	1	ns	0.284897	-0.39	1.52
psychosocial	CD14	-2 Min	+40 Min	8	-0.705019	7	0.504	1	ns	-0.249262	-1.03	0.52
physical	CD14	-2 Min	+2 Min	10	-3.83138	9	0.004	0.016	*	-1.21159	-2.38	-0.68
physical	CD14	-2 Min	+15 Min	10	-1.30474	9	0.224	0.896	ns	-0.412596	-1.3	0.19
physical	CD14	-2 Min	+30 Min	10	-0.617561	9	0.552	1	ns	-0.19529	-1.27	0.44
physical	CD14	-2 Min	+40 Min	10	0.447248	9	0.665	1	ns	0.141432	-0.65	0.78
psychosocial	CD16	-2 Min	+2 Min	17	-1.9111	16	0.074	0.296	ns	-0.463509	-0.98	-0.04
psychosocial	CD16	-2 Min	+15 Min	17	0.112398	16	0.912	1	ns	0.0272605	-0.57	0.52
psychosocial	CD16	-2 Min	+30 Min	17	0.332679	16	0.744	1	ns	0.0806866	-0.43	0.61
psychosocial	CD16	-2 Min	+40 Min	17	-0.715929	16	0.484	1	ns	-0.173638	-0.61	0.42
physical	CD16	-2 Min	+2 Min	13	-4.00693	12	0.002	0.007	**	-1.11132	-2.23	-0.52
physical	CD16	-2 Min	+15 Min	13	-2.65784	12	0.021	0.084	ns	-0.737152	-2.25	-0.13
physical	CD16	-2 Min	+30 Min	13	-3.04418	12	0.01	0.041	*	-0.844304	-1.81	-0.31
physical	CD16	-2 Min	+40 Min	13	-2.27496	12	0.042	0.168	ns	-0.630961	-1.24	-0.16
psychosocial	CD41	-2 Min	+2 Min	12	-1.33198	11	0.21	0.84	ns	-0.384509	-1.08	0.16
psychosocial	CD41	-2 Min	+15 Min	12	-0.137396	11	0.893	1	ns	-0.0396628	-0.66	0.77
psychosocial	CD41	-2 Min	+30 Min	12	-1.05449	11	0.314	1	ns	-0.304405	-1.27	0.25
psychosocial	CD41	-2 Min	+40 Min	12	-0.202042	11	0.844	1	ns	-0.0583245	-0.89	0.51
physical	CD41	-2 Min	+2 Min	12	-5.45824	11	0.000198	0.000792	***	-1.57566	-3.12	-1.04
physical	CD41	-2 Min	+15 Min	12	-3.4234	11	0.006	0.023	*	-0.98825	-1.79	-0.58
physical	CD41	-2 Min	+30 Min	12	-1.72363	11	0.113	0.452	ns	-0.497568	-1.28	0.06
physical	CD41	-2 Min	+40 Min	12	-0.893246	11	0.391	1	ns	-0.257858	-1.24	0.29
psychosocial	CD44	-2 Min	+2 Min	13	-2.60571	12	0.023	0.092	ns	-0.722693	-1.4	-0.24
psychosocial	CD44	-2 Min	+15 Min	13	-1.06427	12	0.308	1	ns	-0.295174	-1.12	0.21
psychosocial	CD44	-2 Min	+30 Min	13	-0.292703	12	0.775	1	ns	-0.0811813	-0.9	0.42
psychosocial	CD44	-2 Min	+40 Min	13	-1.5637	12	0.144	0.576	ns	-0.433693	-1.01	0.1
physical	CD44	-2 Min	+2 Min	11	-3.82205	10	0.003	0.013	*	-1.15239	-2.23	-0.67
physical	CD44	-2 Min	+15 Min	11	-4.50057	10	0.001	0.005	**	-1.35697	-2.62	-0.92
physical	CD44	-2 Min	+30 Min	11	-1.55141	10	0.152	0.608	ns	-0.467768	-1.24	0.08
physical	CD44	-2 Min	+40 Min	11	-1.68264	10	0.123	0.492	ns	-0.507334	-2	0.05
psychosocial	CD63	-2 Min	+2 Min	11	-0.855358	10	0.412	1	ns	-0.2579	-1.04	0.39
psychosocial	CD63	-2 Min	+15 Min	11	-0.423813	10	0.681	1	ns	-0.127784	-0.75	0.67
psychosocial	CD63	-2 Min	+30 Min	11	-1.41819	10	0.187	0.748	ns	-0.427601	-0.97	0.15
psychosocial	CD63	-2 Min	+40 Min	11	-1.39184	10	0.194	0.776	ns	-0.419656	-1.13	0.19
physical	CD63	-2 Min	+2 Min	10	-3.01422	9	0.015	0.058	ns	-0.953181	-2.3	-0.41
physical	CD63	-2 Min	+15 Min	10	-2.85756	9	0.019	0.076	ns	-0.90364	-1.8	-0.45
physical	CD63	-2 Min	+30 Min	10	-0.33383	9	0.746	1	ns	-0.105566	-0.72	0.69
physical	CD63	-2 Min	+40 Min	10	0.10037	9	0.922	1	ns	0.0317396	-0.57	0.78
psychosocial	HLA.DR	-2 Min	+2 Min	11	-0.922542	10	0.378	1	ns	-0.278157	-1.14	0.41
psychosocial	HLA.DR	-2 Min	+15 Min	11	-0.0639725	10	0.95	1	ns	-0.0192884	-0.58	0.88
psychosocial	HLA.DR	-2 Min	+30 Min	11	0.237359	10	0.817	1	ns	0.0715663	-0.47	0.85
psychosocial	HLA.DR	-2 Min	+40 Min	11	-0.210777	10	0.837	1	ns	-0.0635517	-0.71	0.62
physical	HLA.DR	-2 Min	+2 Min	14	-7.21557	13	6.79e-06	2.72e-05	****	-1.92844	-2.98	-1.52
physical	HLA.DR	-2 Min	+15 Min	14	-4.07881	13	0.001	0.005	**	-1.09011	-2.35	-0.47
physical	HLA.DR	-2 Min	+30 Min	14	-2.57595	13	0.023	0.092	ns	-0.688451	-1.76	-0.2
physical	HLA.DR	-2 Min	+40 Min	14	-1.29913	13	0.216	0.864	ns	-0.347207	-1.16	0.2
